# Supplementary material for: Observation and modeling of atmospheric OH and HO 2 ∗ radicals at a subtropical rural site and implications for secondary pollutants
Source: Copernicus journal article supplement (doi:10.5194/acp-25-8147-2025), 2025-07-30
Supplement: Supplementary file 1 [file acp-25-8147-2025-supplement.zip]

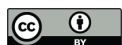

*Supplement of*

## **Observation and modeling of atmospheric OH and HO<sub>2</sub><sup>\*</sup> radicals at a subtropical rural site and implications for secondary pollutants**

**Zhouxing Zou et al.**

*Correspondence to:* Tao Wang (tao.wang@polyu.edu.hk)

- [acp-25-8147-2025-supplement-title-page.pdf](#)
- [Supplement.docx](#)

The copyright of individual parts of the supplement might differ from the article licence.
